# Supplementary material for: Tungstic acid-functionalized Fe3O4@TiO2: preparation, characterization and its application for the synthesis of pyrano[2,3-c]pyrazole derivatives as a reusable magnetic nanocatalyst
Source: Royal Society of Chemistry journal article supplement (doi:10.1039/c8ra06886k), 2018-01-01
Supplement: c8ra06886k1.pdf [file c8ra06886k1.pdf]

## Supporting Information

### Tungstic acid-functionalized $\text{Fe}_3\text{O}_4@ \text{TiO}_2$ : Preparation, characterization and its application for the synthesis of pyrano[2,3-*c*]pyrazole derivatives as a reusable magnetic nanocatalyst

Jamileh Etemad Gholtash and Mahnaz Farahi\*

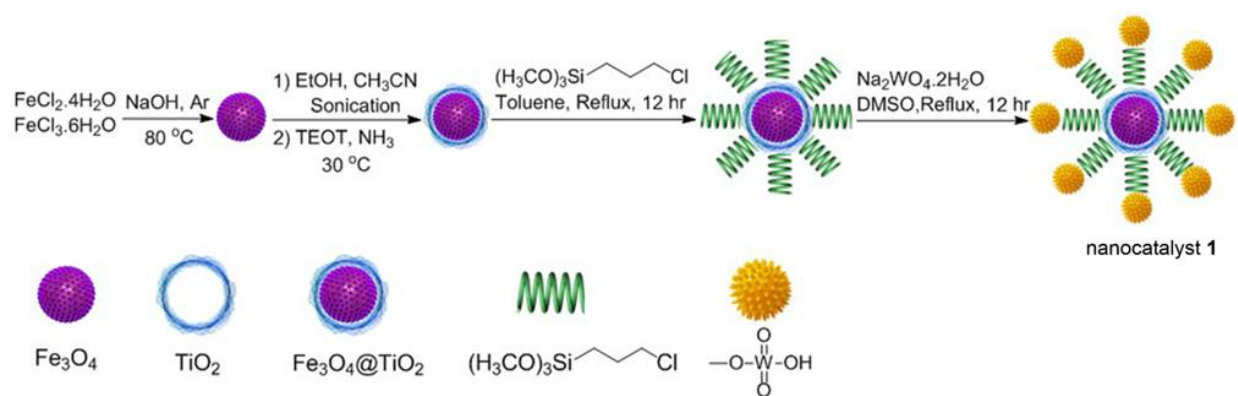

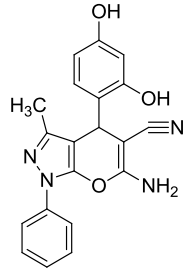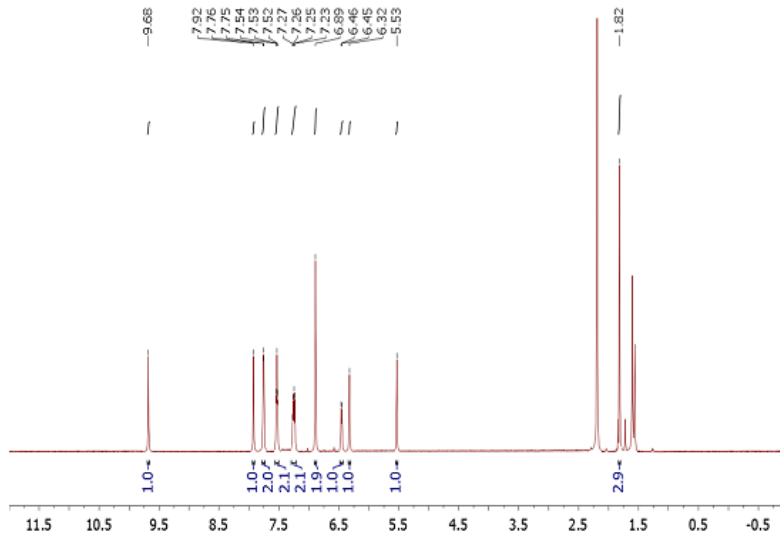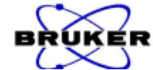

NAME Yasooj UN  
 EXPNO 1154  
 PROCNO 1  
 Date\_ 20180524  
 Time 18.30  
 INSTRUM spect  
 PROBHD 5 mm PABBO BB-  
 PULPROG zg30  
 TD 65536  
 SOLVENT DMSO  
 NS 20  
 DS 0  
 SWH 8012.820 Hz  
 FIDRES 0.122266 Hz  
 AQ 4.0894966 sec  
 RG 181  
 DW 62.400 usec  
 DE 6.50 usec  
 TE 293.9 K  
 D1 4.0000000 sec  
 TDO 1

===== CHANNEL f1 =====  
 NUC1 1H  
 P1 14.00 usec  
 PL1 -2.00 dB  
 PL1W 11.86359406 W  
 SFO1 400.2236020 MHz  
 SI 32768  
 SF 400.2200000 MHz  
 WDW EM  
 SSB 0  
 LB 0.30 Hz  
 GB 0  
 PC 1.00

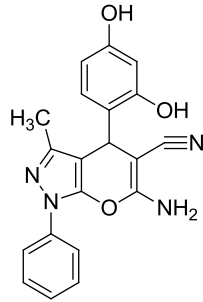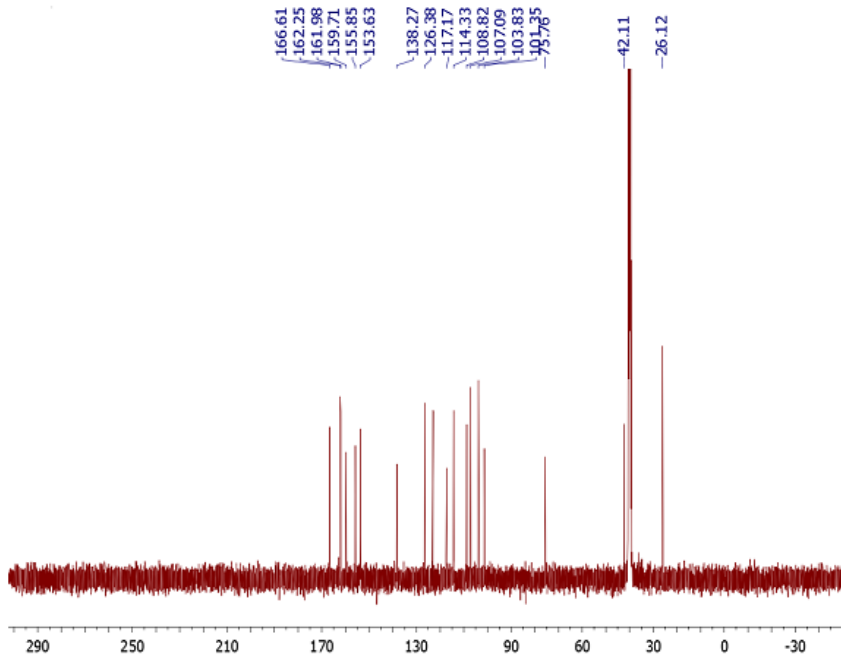

166.61  
162.25  
161.98  
159.71  
155.85  
153.63  
138.27  
126.38  
117.17  
114.33  
108.82  
107.09  
103.83  
101.85  
42.11  
26.12

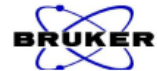

```

NAME      Ym005.U11
EXPNO     1
PROCNO    1
Date_    20180224
Time      18.41
INSTRUM   spect
PROBHD    5 mm PABBO BB-
PULPROG   zgpg30
TD         65536
SOLVENT   CDCl3
NS         8192
DS         0
SWH       35714.380 Hz
FREQS     6.54657 Hz
AQ         0.9179540 sec
RG         3250
DW         14.000 usec
DE         6.50 usec
TE         293.8 K
D1         1.0000000 sec
D11        0.0300000 sec
TD0        1

```

```

***** CHANNEL f1 *****
NUC1      13C
P1         9.00 usec
PL1        -0.90 dB
PL1W      42.03803895 W
SFO1      100.627704 MHz

```

```

***** CHANNEL f2 *****
CPDPRG2   waltz16
NUC2       1H
PCPD2     90.00 usec
P12        -2.00 dB
PL12       14.16 dB
PL13       17.00 dB
P12W      11.86335806 W
PL12W     0.3872204 W
PL13W     0.17139934 W
SFO2      400.1274000 MHz
SI         32768
SF         100.6253990 MHz
WDW        EM
SSB         0
LB         1.00 Hz
GB          0
PC         1.40

```

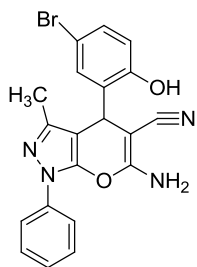

Yasooj UN.1154.1.1r  
Sample code: 2 (Yarinejade)

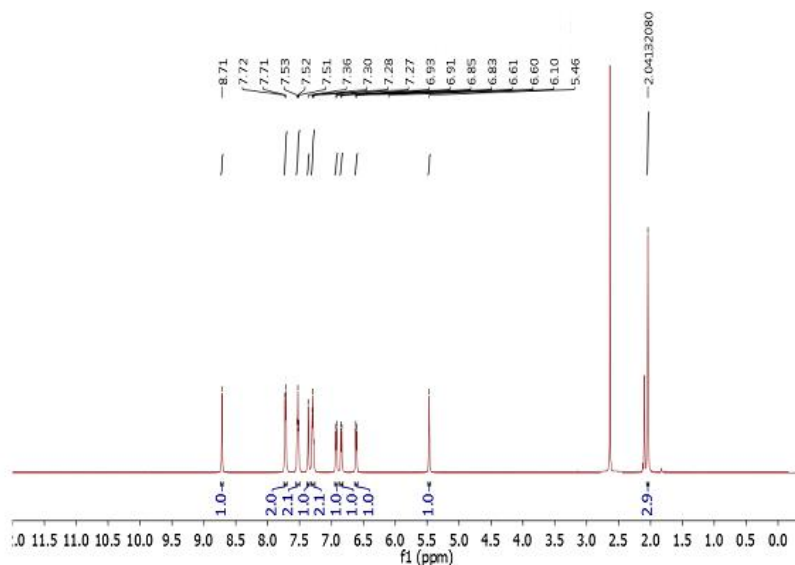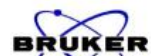

NAME Yasooj UN  
EXPNO 1154  
PROCNO 1  
Date\_ 20180524  
Time 18.30  
INSTRUM spect  
PROBHD 5 mm PABBO BB-  
PULPROG zg30  
TD 65536  
SOLVENT DMSO  
NS 20  
DS 0  
SWH 8012.820 Hz  
FIDRES 0.122266 Hz  
AQ 4.0894966 sec  
RG 181  
DW 62.400 usec  
DE 6.50 usec  
TE 293.9 K  
D1 4.00000000 sec  
TD0 1

===== CHANNEL f1 =====  
NUC1 1H  
P1 14.00 usec  
PL1 -2.00 dB  
PL1W 11.86359406 W  
SFO1 400.2236020 MHz  
SI 32768  
SF 400.2200000 MHz  
WDW EM  
SSB 0  
LB 0.30 Hz  
GB 0  
PC 1.00

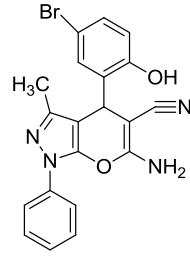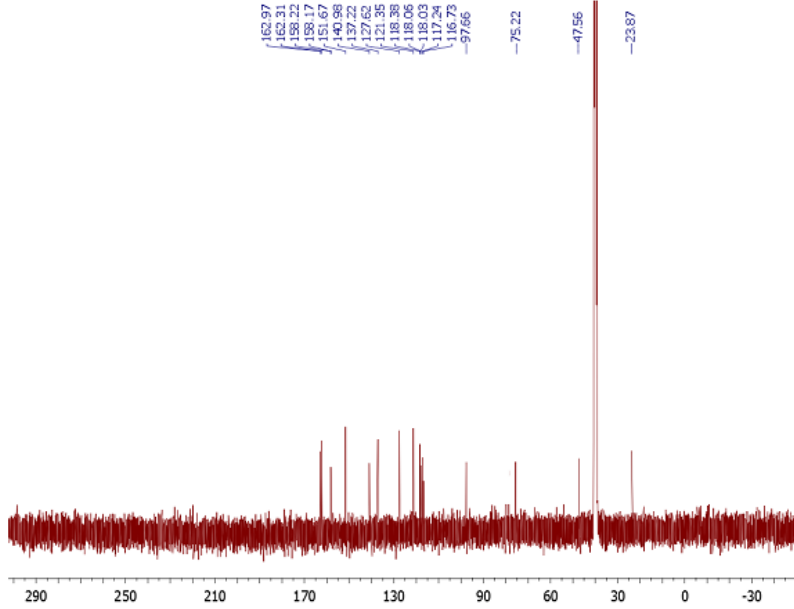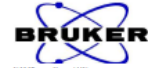

```

NAME       Yangq LU
EXPNO      1123
PROCNO     1
Date_      20180524
Time       16:41
INSTRUM    spect
PROBHD     5 mm PABBO BB-
PULPROG    zgpg30
TD          65536
SOLVENT    DMSO
NS          8192
DS          0
SFO1       3271.4285 Hz
FREQS1     0.544957 Hz
AQ          0.0179560 sec
RG          3250
DW          14.200 usec
DE          6.50 usec
TE          303.2 K
D1          1.00000000 sec
D11        0.00000000 sec
TD0         1

```

```

***** CHANNEL f1 *****
NUC1       13C
P1         0.00 usec
PL1        -0.00 dB
PL1W       47.02801895 W
SFO1       100.6470784 MHz

***** CHANNEL f2 *****
CPDPRG2    waltz16
NUC2       1H
PCPD2     90.00 usec
PL2        -2.00 dB
PL12       14.16 dB
PL13       17.90 dB
PL1W       11.86219496 W
PL12W      0.38722104 W
PL13W      0.12139938 W
SFO2       400.2218000 MHz
SI          32768
SF         100.6283800 MHz
WDW         EM
SSB         0
LB          3.00 Hz
GB          0
PC          1.40

```
